# Supplementary material
Source: publisher figshare collection journal article supplement (https://acs.figshare.com/ndownloader/files/3781072)
Supplement: Supplementary file 1 [file 3781072]

# CO oxidation on Gold-supported Iron Oxides: New Insights into Strong Oxide-Metal Interactions

Liang Yu,<sup>1,2</sup> Yun Liu,<sup>1,2</sup> Fan Yang,<sup>1,2</sup> Jaime Evans,<sup>3</sup> Jose A. Rodriguez,<sup>4\*</sup> and Ping Liu<sup>4\*</sup>

1 Collaborative Innovation Center of Chemistry for Energy Materials, Xiamen University, Xiamen 361006, China

2 State Key Laboratory of Catalysis, Dalian Institute of Chemical Physics, Dalian 116023, China

3 Facultad de Ciencias, Universidad Central de Venezuela, Apartado 20513, Caracas 1020-A, Venezuela

4 Chemistry Department, Brookhaven National Laboratory, Upton, New York 11973, United States

## Computational details

Based on the periodicity of bright spots and moiré pattern from STM measurements, the FeO(111) bilayer on Au was simulated with a slab model of Au(111) in a 12×12 supercell (35.4Å × 35.4Å) of pre-optimized gold lattice; the FeO bilayer with lattice distance of 3.05Å was extracted from the optimized FeO bulk and rotated by 4.3 degree along the z axis with respect to the gold lattice to match the periodicity of the supercell. The Fe<sub>3</sub>O<sub>4</sub>(111) overlayer on Au(111) was simulated with a supercell of 4×4 Au(111) slab supporting a 2×2 Fe<sub>3</sub>O<sub>4</sub>(111) slab. The Fe<sub>2</sub>O<sub>3</sub>(001) overlayer on Au(111) was simulated with a supercell of 5×5 Au(111) slab supporting a 3×3 Fe<sub>2</sub>O<sub>3</sub>(001) slab.

The phase change of FeO<sub>x</sub> in dependence of the chemical potential of CO and O<sub>2</sub> was calculated based on the thermodynamic method reported in Ref 1. For two different phases on exposure to both CO and O<sub>2</sub>, the redox reactions were considered, e.g.

Reduction reaction:  $\text{FeO}_x + \text{CO} \rightarrow \text{FeO}_{x-1} + \text{CO}_2$

Oxidation reaction:  $\text{FeO}_{x-1} + \frac{1}{2}\text{O}_2 \rightarrow \text{FeO}_x$

Under the equilibrium condition for FeO<sub>x</sub> and FeO<sub>x-1</sub> phases, the free energy changes for FeO<sub>x</sub> reduction and FeO<sub>x-1</sub> oxidation reaction are in equivalent, i.e.  $\Delta G_{\text{red}} = \Delta G_{\text{ox}}$ , in which,

$$\Delta G_{\text{red}} = \mu(\text{FeO}_{x-1}) + \mu(\text{CO}_2) - \mu(\text{FeO}_x) - \mu(\text{CO})$$

$$\Delta G_{\text{ox}} = \mu(\text{FeO}_x) - \mu(\text{FeO}_{x-1}) - \frac{1}{2}\mu(\text{O}_2)$$

where  $\mu$  is the chemical potential.

For the iron or iron compound phases, we use the DFT calculated total energy ( $E_{\text{total}}$ ) as the chemical potential, i.e.  $\mu(\text{FeO}_x) = E_{\text{total}}(\text{FeO}_x/\text{Au}) - E_{\text{total}}(\text{Au})$ .

For the gas phases, such as CO, O<sub>2</sub>, and CO<sub>2</sub>, the chemical potential was calculated as  $E_{\text{total}} + \text{ZPE} + \Delta\mu$ , where  $\Delta\mu = -TS + kT\ln(P/P^0)$ , T is temperature, S is entropy, P is the partial pressure, P<sup>0</sup> is the standard atmosphere pressure, and ZPE is the zero point energy correction.

## Results

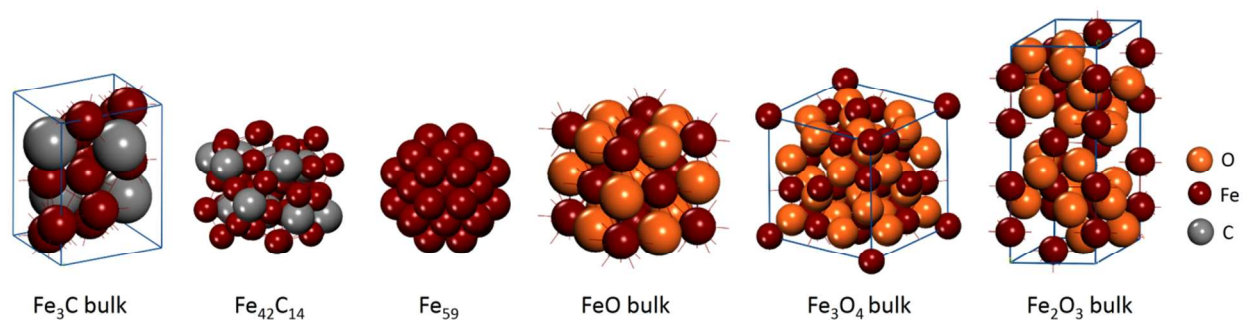

Figure S1. DFT-optimized structures of  $\text{Fe}_3\text{C}$  bulk,  $\text{Fe}_{42}\text{C}_{14}$  cluster,  $\text{Fe}_{59}$  cluster,  $\text{FeO}$  bulk,  $\text{Fe}_3\text{O}_4$  bulk, and  $\text{Fe}_2\text{O}_3$  bulk.

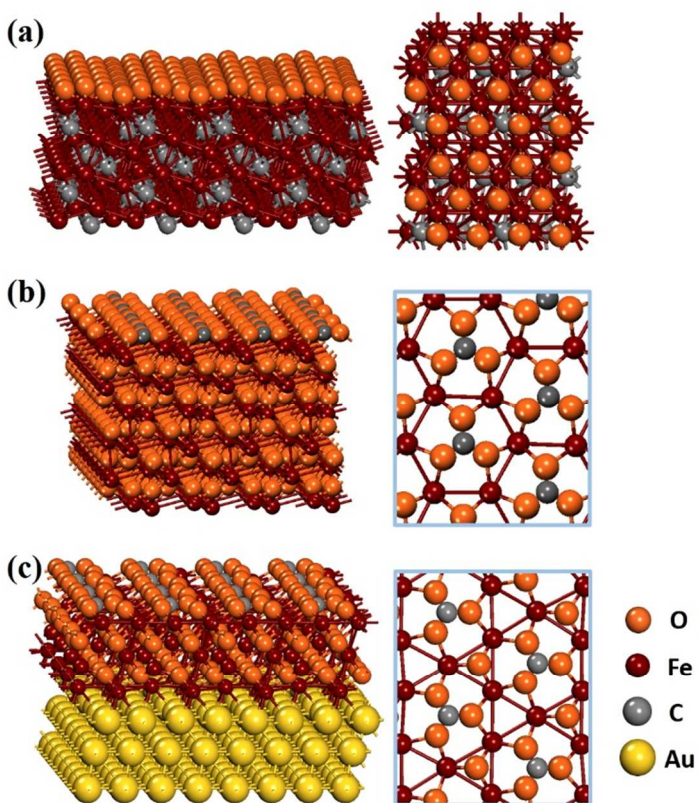

Figure S2. (a)  $\text{Fe}_3\text{C}(001)$  surface fully covered by  $\text{O}_{\text{ads}}$  species. (b)  $\text{Fe}_2\text{O}_3(001)$  surface and (b) terrace of  $\text{Fe}_3\text{O}_4(111)$  overlayer on  $\text{Au}(111)$  passivated by surface carbonate structures. The right column is the top view of the surfaces.

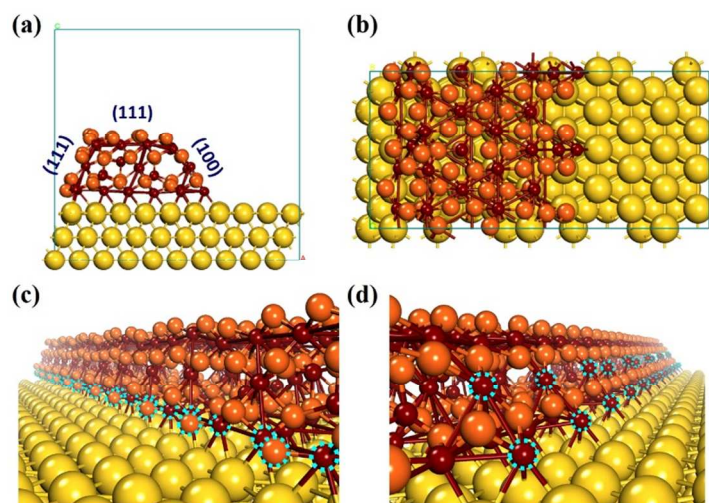

Figure S3. (a) Sectional view and (b) top view of the strip model of Fe<sub>3</sub>O<sub>4</sub> on Au(111). Perspective view of (c) Fe<sub>3</sub>O<sub>4</sub>(111)/Au and (d) Fe<sub>3</sub>O<sub>4</sub>(100)/Au interfaces. The dotted circles denote the active sites for CO oxidation.

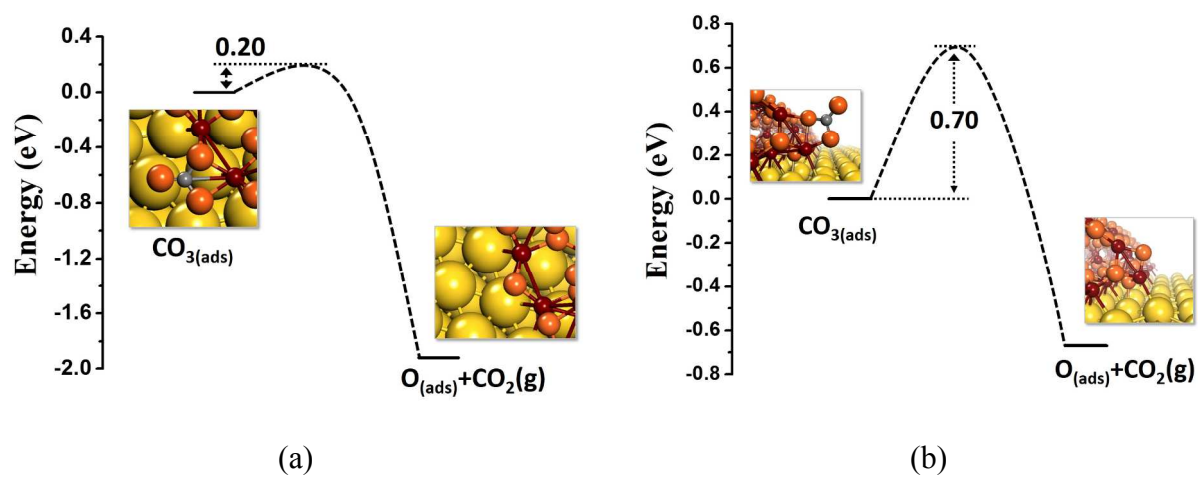

Figure S4. Energetics and kinetics of carbonate formation at the interfacial sites of (a) Fe<sub>3</sub>O<sub>4</sub>(111)/Au and (b) Fe<sub>3</sub>O<sub>4</sub>(100)/Au. The entropy contributions at 575K for the steps involving gas phase CO, O<sub>2</sub> and CO<sub>2</sub> were included.

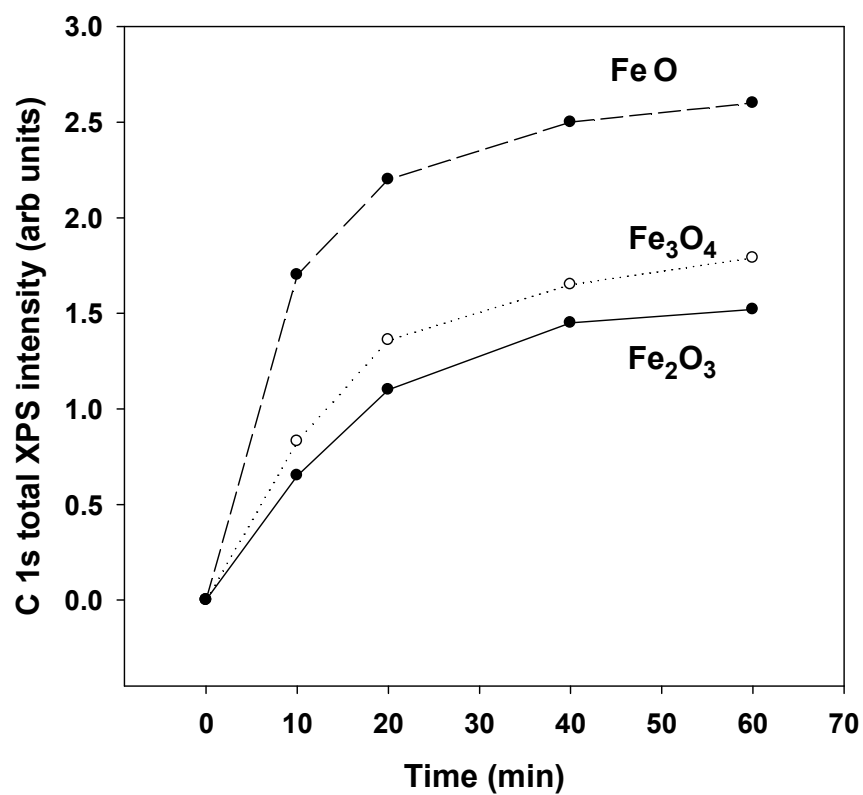

Figure S5. Accumulation of carbon-containing species on FeO/Au(111), Fe<sub>3</sub>O<sub>4</sub>/Au(111) and Fe<sub>2</sub>O<sub>3</sub>/Au(111) as a function of time upon exposure to a mixture of 5 Torr of CO and 5 Torr of O<sub>2</sub> at 575 K.

#### Reference

[1] K. Reuter and M. Scheffler, *Physical Review B*, **2001**, 65, 035406.
